# Supplementary material
Source: ML conference proceedings conference paper supplement (https://openreview.net/forum?id=FEN5IDI0Nn)
Supplement: supplementary_material [file attachment]

## A Limitations and future work

We believe that the NeuroSEED framework has the potential to be applied to numerous problems and this work constitutes an initial analysis of its geometrical properties and applications. Here, we list some of the limitations of the current analysis and the potential directions of research to cover them.

**Type of sequences** Both real-world datasets analysed consist of sequence reads of the same part of the genome. This is a widespread set-up for sequence analysis but not ubiquitous. Shotgun metagenomics consists of sequencing random parts of the genome. This would generate sequences lying on a low-dimensional manifold where the hierarchical relationship of evolution is combined with the relationship based on the specific position in the whole genome. Therefore, more complex geometries, such as product spaces [47, 48], might be best suited. Moreover, while the sequence reads in our datasets were all of approximately the same size, this might not be the case in every domain. Future work could explore the best way to extend the architectures to inputs of significantly different length.

**Type of labels** In this project, we work with edit distances between sequences, these are too expensive for large-scale analysis, but it is feasible to produce a large enough training set. For different definitions of distance, however, this might not be the case, future work could explore the robustness of this framework to inexact estimates of the distances as labels.

**Architectures** Throughout the project, we used models that have been shown to work well for other types of sequences and tasks. However, the correct inductive biases that models should have to perform NeuroSEED might be different and even dependent on the type of distance they try to preserve. [21, 12] provide some initial work in this direction with respect to the edit distance. Moreover, the capacity of the hyperbolic space could be further exploited using models that directly operate in the space [46, 49, 50].

**Self-supervised embeddings** Finally, the direct use of the embeddings produced by NeuroSEED for downstream tasks would enable the application of a wide range of geometric data processing tools to the analysis of biological sequences.

**Long-term impact** We believe the combination of NeuroSEED embeddings and geometric deep learning [51, 52] techniques could be beneficial to analyse and track the spectrum of mutations in a wide variety of biological and medical applications. This would have positive societal impacts in domains like microbiome analysis and managing epidemics. However, this could also have unethical applications in fields such as genome profiling.

## B Bioinformatics tasks

The field of bioinformatics has developed a wide range of algorithms to tackle the classical problems that we explore. We describe here the methods that are most closely related to our work. For a more comprehensive overview, the interested reader is recommended Gusfield [53] and Compeau *et al.* [54].

### B.1 Edit distance approximation

The task of finding the distance or similarity between two strings and the related task of global alignment lies at the foundation of bioinformatics.

**Alignment-based methods** Classical algorithms to find the edit distance, such as Needleman–Wunsch [4], are based on the process of finding an alignment between the two strings via dynamic programming. However, these are bound to a quadratic complexity w.r.t. the length of the input sequence, the best algorithm [55] has a complexity  $O(M^2 / \log M)$  and there is evidence that this cannot be improved [56].

**Alignment-free methods** With the rapid improvement of sequencing technologies and the subsequent increase in demand for large-scale sequence analyses, alternative computationally efficient sequence comparison methods have been developed under the category of alignment-free methods.

537 **k-mer** [5] is the most commonly used alignment-free method and basis for many other algorithms  
 538 (such as FFP [57], ACS [58] and kmacs [59]). It considers all the sequences of a fixed length  $k$ ,  
 539  $k$ -mers, and constructs a vector where each entry corresponds with the number of occurrences of a  
 540 particular  $k$ -mer in the sequence. The distance between the strings is then approximated by some  
 541 type of distance  $d$  between the vectors. Therefore,  $k$ -mer generates vectors of size  $4^k$  and estimates  
 542 the edit distance as  $ED(s_1, s_2) \approx n \alpha d(\text{k-mer}(s_1), \text{k-mer}(s_2))$  where  $\alpha$  is the only parameter of the  
 543 model whose optimal value can be obtained with a single pass of the training set <sup>2</sup>:

$$\alpha^* = \arg \min_{\alpha} \sum_{ij} (r_{ij} - \alpha p_{ij})^2 \quad (3)$$

544 where  $r_{ij} = n^{-1} ED(s_i, s_j)$  and  $p_{ij} = d(\text{k-mer}(s_i), \text{k-mer}(s_j))$ . Therefore:

$$\begin{aligned} \frac{\partial}{\partial \alpha} \sum_{ij} (r_{ij} - \alpha p_{ij})^2 |_{\alpha=\alpha^*} &= 0 \\ \sum_{ij} \frac{\partial}{\partial \alpha} (r_{ij}^2 - 2\alpha r_{ij} p_{ij} + \alpha^2 p_{ij}^2) |_{\alpha=\alpha^*} &= 0 \\ \therefore \alpha^* &= \frac{\sum_{ij} r_{ij} p_{ij}}{\sum_{ij} p_{ij}^2} \end{aligned} \quad (4)$$

## 545 B.2 Hierarchical clustering

546 **Single, Complete and Average Linkage** The most common class of algorithms for *hierarchical*  
 547 *clustering*, referred to as agglomerative methods, works in a bottom-up manner recursively merging  
 548 similar clusters. These differ by the heuristics used to choose clusters to merge and include Single  
 549 [16], Complete [17] and Average Linkage (or UPGMA) [6]. They typically run in  $O(N^2 \log N)$  and  
 550 require the whole  $N^2$  distance matrix as input. Thus, with the edit distance, the total complexity is  
 551  $O(N^2(M^2/\log M + \log N))$ .

552 **Dasgupta's cost** Dasgupta [15] proposed a global objective function that can be associated with the  
 553 HC trees. Given a rooted binary tree  $T$ , for two datapoints  $i$  and  $j$  let  $w_{ij}$  be their pairwise similarity,  
 554  $i \vee j$  their lowest common ancestor in  $T$  and  $T[i \vee j]$  the subtree rooted at  $i \vee j$ . Dasgupta's cost of  
 555  $T$  given  $w$  is then defined as:

$$C_{\text{Dasgupta}}(T; w) = \sum_{ij} w_{ij} |\text{leaves}(T[i \vee j])| \quad (5)$$

556 In this work  $w_{ij}$  is taken to be  $1 - d_{ij}$  where  $d_{ij}$  is the normalised distance between sequences  $i$  and  
 557  $j$ .

## 558 B.3 Multiple sequence alignment

559 **Multiple Sequence Alignment** (MSA) consists of aligning three or more sequences and is regularly  
 560 used for phylogenetic tree estimation, secondary structure prediction and critical residue identification.  
 561 Finding the global optimum alignment of  $N$  sequences is NP-complete [60], therefore many heuristics  
 562 have been proposed.

563 **Progressive alignment** The most commonly used programs such as the Clustal series [7] and  
 564 MUSCLE [61] are based on a phylogenetic tree estimation phase from the pairwise distances which  
 565 produces a guide tree, which is then used to guide a progressive alignment phase. To replicate the  
 566 classical edit distance used, Clustal is run with a substitution matrix with all the entries -1 except 0  
 567 on the main diagonal and gap opening and extension penalties equal to 1.

568 **Consensus error and Steiner string** It is hard to quantify the goodness of a particular multiple  
 569 alignment and there is no single well-accepted measure [53]. One option is to find the sequence  $s^*$   
 570 that minimises the *consensus error* to the set of strings  $S$ :  $E(s^*) = \sum_{s_i \in S} ED(s^*, s_i)$ . The optimal  
 571 string  $s^*$  is known as *Steiner string*, while the *centre string*  $s_c$  is the one in  $S$  which minimises  $E(s_c)$   
 572 and has an upper bound  $E(s_c) \leq (2 - 2/M)E(s^*)$  [53]. Algorithms to find an approximation of the  
 573 Steiner string typically use greedy heuristics [45, 44].

<sup>2</sup>Except when using the hyperbolic space, in which case the radius of the hypersphere to which points are projected and  $\alpha$  are learned via gradient descent.

## 574 B.4 Datasets

575 For all tasks as real-world datasets we used the Qiita and RT988 datasets of 16S rRNA subsequences.  
 576 Experiments were also run on synthetic datasets formed by sequences randomly generated. In all  
 577 datasets the splitting of sequences between train/val/test was random and duplicate sequences were  
 578 discarded. Below we list the sizes of the datasets used for the results presented, these datasets can be  
 579 downloaded from the public code repository.

580 **Edit distance approximation** RT988 5000/500/1200 sequences (train/val/test, 25M training pair-  
 581 wise distances), Qiita 7000/700/1500 sequences (49M distances), synthetic 70k/10k/20k sequences  
 582 (3.5M distances).

583 **Hierarchical clustering** the RT988 dataset is formed by 6.7k sequences to cluster while the Qiita  
 584 one contains 10k sequences. The Qiita dataset used in the unsupervised approach is disjoint from the  
 585 training set of the models.

586 **Multiple sequence alignment** for the unsupervised approach the test set from the edit distance  
 587 RT988 dataset was used, while the Steiner string approach was tested on the RT988 dataset using  
 588 4500/700 sequences for training/validation and 50 groups of 30 sequences for each of which the  
 589 model computes an approximation of the Steiner string.

## 590 C Neural architectures

591 The framework of NeuroSEED is independent of the choice of architecture for the encoder. For each  
 592 approach proposed in this project, we experiment with a series of models among the most commonly  
 593 used in the literature for the analysis of sequences. In this section, we give some detail on how each  
 594 model was adapted to the task at hand.

595 **Linear & MLP** operate on the input sequence using the one-hot encodings, padding to the maxi-  
 596 mum sequence length and flattening as a vector.

597 **CNN** is also applied to the padded sequence of one-hot elements. They are conceptually similar to  
 598 the k-mer baseline with a few distinctions: CNNs can learn the kernels to apply, CNNs are equivariant  
 599 not invariant to the translation of the patterns and, with multiple layers, CNNs can exploit hierarchical  
 600 patterns in the data.

601 **GRU** [25] operates on the sequence of one-hot sequence elements.

602 **Transformer** [26] every token is formed by 4-16 bases and is given a specific positional encoding  
 603 using sinusoidal functions. We test both global attention where every token queries all the others and  
 604 local where it only queries its 2 neighbours. Local attention allows the model to have a complexity  
 605 linear w.r.t. the number of tokens.

606 All the models are integrated with various forms of regularisation including weight decay, dropout  
 607 [62], batch normalisation [63] and layer normalisation [64] and optimised using the Adam optimiser  
 608 [65]. In the hyperbolic space, the embedded points are first projected on a hypersphere of learnable  
 609 radius and then to the hyperbolic space.

## 610 D Distance functions

611 The key idea behind NeuroSEED is to map sequences into a vector space so that the distances in  
 612 the sequence and the vector space are correlated. In this appendix, we present various definitions  
 613 of distance in the vector space that we explored: L1 (referred as *Manhattan*), L2 (*Euclidean*), L2  
 614 squared (*square*), *cosine* and *hyperbolic* distances. For the hyperbolic space, we use the Poincaré ball  
 615 model that embeds the points of the n-dimensional Riemannian manifold in an n-dimensional unit  
 616 sphere  $\mathbb{B}^n = \{x \in \mathbb{R}^n : \|x\| < 1\}$  where  $\|\cdot\|$  denotes the Euclidean norm. Given a pair of vectors  $\mathbf{p}$   
 617 and  $\mathbf{q}$  of dimension  $k$ , the definitions for the distances are:

$$\text{Manhattan} \quad d(\mathbf{p}, \mathbf{q}) = \|\mathbf{p} - \mathbf{q}\|_1 = \sum_{i=0}^k |p_i - q_i| \quad (6)$$

$$\text{Euclidean } d(\mathbf{p}, \mathbf{q}) = \|\mathbf{p} - \mathbf{q}\|_2 = \sqrt{\sum_{i=0}^k (p_i - q_i)^2} \quad (7)$$

$$\text{square } d(\mathbf{p}, \mathbf{q}) = \|\mathbf{p} - \mathbf{q}\|_2^2 = \sum_{i=0}^k (p_i - q_i)^2 \quad (8)$$

$$\text{cosine } d(\mathbf{p}, \mathbf{q}) = 1 - \frac{\mathbf{p} \cdot \mathbf{q}}{\|\mathbf{p}\| \|\mathbf{q}\|} = 1 - \frac{\sum_{i=0}^k p_i q_i}{\sqrt{\sum_{i=0}^k p_i^2} \sqrt{\sum_{i=0}^k q_i^2}} \quad (9)$$

$$\text{hyperbolic } d(\mathbf{p}, \mathbf{q}) = \text{arcosh} \left( 1 + 2 \frac{\|\mathbf{p} - \mathbf{q}\|^2}{(1 - \|\mathbf{p}\|^2)(1 - \|\mathbf{q}\|^2)} \right) \quad (10)$$

## E Distortion on synthetic datasets

We used a dataset of randomly generated sequences to test the importance of data-dependent approaches and understand whether the improvements shown in Section 5 are brought by a better capacity of the neural models to model the edit distance mutation process or their ability to focus on the lower-dimensional manifold that the real-world data lies on.

| Model     | Cosine      | Euclidean   | Square      | Manhattan | Hyperbolic |
|-----------|-------------|-------------|-------------|-----------|------------|
| 2-mer     | 10.49       | 7.11        | 10.53       | 7.28      | 7.11       |
| 3-mer     | 5.71        | 6.02        | 5.81        | 6.01      | 5.99       |
| 4-mer     | <b>3.74</b> | 6.24        | <b>3.87</b> | 5.92      | 6.23       |
| 5-mer     | 3.92        | 6.75        | <b>3.97</b> | 5.72      | 6.75       |
| 6-mer     | 4.71        | 7.26        | <b>4.72</b> | 5.37      | 7.31       |
| Linear    | 4.77±0.04   | 33.90±35.12 | 5.25±0.03   | -         | 6.50±0.60  |
| MLP       | 9.79±0.08   | 9.40±0.05   | 7.74±0.05   | 9.82±0.06 | 10.71±0.18 |
| CNN       | 4.18±0.25   | 4.93±0.04   | 4.93±0.03   | 5.48±0.06 | 4.60±0.15  |
| GRU       | 6.30±4.93   | 5.11±0.10   | 5.60±4.33   | 5.68±0.22 | 8.54±0.84  |
| Global T. | 4.51±0.01   | 4.74±0.02   | 5.23±0.03   | 4.67±0.04 | 4.75±0.04  |
| Local T.  | 4.45±0.03   | 4.86±0.03   | 5.05±0.03   | 4.87±0.02 | 4.49±0.03  |

Figure 10: % RMSE test set results on the synthetic dataset. The embedding space dimensions are as in Figure 2.

The picture that emerges from the results shown in Figure 10 is dramatically different from the one of real-world datasets and confirms the hypothesis that the advantage of neural models in real-world datasets is mainly due to their capacity to exploit the low-dimensional assumption. Here, instead, the best neural models perform only on par (taking into account the difference embedding space dimension) with the baselines. This is caused by two related challenges: the incredibly large space of sequences ( $4^{1024}$ ) that the model is trying to encode and the diversity between training and test sequences due to the random sampling. These make the task of learning a good encoding task too tough for currently feasible sizes of models and training data.

## F Closest string retrieval

This task consists of finding the sequence that is closest to a given query among a large number of reference sequences and is very commonly used by biologists to classify newly sequenced genes.

**Task formulation** Given a pretrained encoder  $f_\theta$ , its closest string prediction is taken to be the string  $r_q \in R$  that minimises  $d(f_\theta(r_q), f_\theta(q))$  for each  $q \in Q$ . This allows for sublinear retrieval via locality-sensitive hashing or other data structures which is critical in real-world applications where databases can have billions of reference sequences. As performance measures, we report the top-1, top-5 and top-10 percentage accuracies, where top- $k$  indicates the percentage of times the closest string is ranked in the top- $k$  predictions.

**Triplet loss** The triplet loss [66, 67, 68] is widely used in the field of metric learning [39, 40] to learn embeddings that can be considered as a more direct form of supervision for this task. Given three examples with feature vectors  $a$  (anchor),  $p$  (positive) and  $n$  (negative) where the  $p$  is supposed to be closer to  $a$  than  $n$ , the triplet loss is typically defined as:

$$L(a, p, n) = \max(0, d(a, p) - d(a, n) + m) \quad (11)$$

where  $m$  is the safety margin and  $d$  a given distance function between vectors (typically Euclidean or cosine).

| Model   |           | Cosine |       |        | Euclidean |       |        | Square |       |        | Manhattan |       |        | Hyperbolic |       |        |
|---------|-----------|--------|-------|--------|-----------|-------|--------|--------|-------|--------|-----------|-------|--------|------------|-------|--------|
|         |           | top 1  | top 5 | top 10 | top 1     | top 5 | top 10 | top 1  | top 5 | top 10 | top 1     | top 5 | top 10 | top 1      | top 5 | top 10 |
| K-mer   | 2-mer     | 25.5   | 42.4  | 50.8   | 23.0      | 40.7  | 49.2   | 23.0   | 40.7  | 49.2   | 21.5      | 38.6  | 47.3   | 25.5       | 42.4  | 50.8   |
|         | 3-mer     | 38.1   | 54.0  | 60.6   | 35.9      | 53.2  | 59.7   | 35.9   | 53.2  | 59.7   | 36.7      | 53.7  | 60.2   | 38.1       | 54.0  | 60.6   |
|         | 4-mer     | 43.8   | 60.3  | 66.9   | 41.5      | 58.3  | 64.3   | 41.5   | 58.3  | 64.3   | 43.2      | 59.4  | 65.8   | 43.8       | 60.3  | 66.9   |
|         | 5-mer     | 45.9   | 62.9  | 69.6   | 44.7      | 60.9  | 67.9   | 44.7   | 60.9  | 67.9   | 45.3      | 62.6  | 68.8   | 45.9       | 62.9  | 69.6   |
|         | 6-mer     | 45.5   | 62.7  | 68.2   | 44.9      | 60.9  | 67.3   | 44.9   | 60.9  | 67.3   | 44.9      | 62.6  | 68.3   | 45.5       | 62.7  | 68.2   |
| MSE     | Linear    | 47.7   | 65.1  | 72.2   | 38.6      | 49.9  | 54.1   | 42.5   | 54.1  | 58.8   | 39.8      | 50.3  | 53.8   | 43.2       | 63.7  | 71.4   |
|         | MLP       | 37.8   | 50.6  | 55.9   | 37.4      | 52.5  | 59.4   | 35.4   | 48.2  | 53.6   | 31.8      | 46.2  | 53.0   | 43.4       | 67.9  | 78.2   |
|         | CNN       | 47.0   | 75.5  | 84.2   | 40.0      | 65.3  | 75.2   | 38.1   | 62.4  | 72.3   | 32.0      | 52.9  | 62.2   | 50.1       | 77.2  | 85.9   |
|         | GRU       | -      | -     | -      | 36.5      | 62.0  | 71.7   | 33.4   | 58.0  | 68.2   | 36.7      | 59.7  | 68.2   | 28.6       | 50.3  | 59.9   |
|         | Global T. | 51.3   | 75.9  | 84.5   | 45.8      | 72.3  | 81.8   | 48.2   | 67.5  | 76.0   | 46.2      | 67.4  | 76.7   | 49.5       | 75.5  | 84.0   |
|         | Local T.  | 49.8   | 75.0  | 84.4   | 42.3      | 66.7  | 75.7   | 47.4   | 66.8  | 75.7   | 43.7      | 68.4  | 77.3   | 48.8       | 75.1  | 84.5   |
| Triplet | Linear    | 47.4   | 70.1  | 78.2   | 41.4      | 53.6  | 58.6   | 43.7   | 54.4  | 58.2   | 40.9      | 51.3  | 54.8   | -          | -     | -      |
|         | CNN       | 46.3   | 76.7  | 85.7   | 32.4      | 56.6  | 68.1   | 24.1   | 44.3  | 54.1   | 33.7      | 60.3  | 71.8   | -          | -     | -      |
|         | Global T. | 48.3   | 75.8  | 84.5   | 45.5      | 71.7  | 81.4   | 45.8   | 70.2  | 80.4   | 44.1      | 69.8  | 79.4   | -          | -     | -      |

Figure 11: Models’ performance averaged over 4 runs of different models for *closest string retrieval* on the Qiita dataset (1k reference and 1k query sequences, disjoint from training set).

**Results** Figure 11 shows that convolutional and attention-based data-dependent models significantly outperform the baselines even when these operate on larger dimensions. In terms of distance functions, the cosine distance achieves performances on par with the hyperbolic. An explanation is that for a set of points on the same hypersphere, the ones with the smallest cosine or hyperbolic distance are the same. The models trained with MSE of pairwise distances and the ones with triplet loss from Section 5 performed similarly except for the hyperbolic space where the triplet loss produces unstable training. The stabilisation of the triplet loss in the hyperbolic space and further comparisons between the two training frameworks are left to future work.

## G Steiner string approach to MSA

In this section we explain more in details the Steiner string approach to *multiple sequence alignment* introduced in Section 7.2.

**Training** For this approach, it is necessary to train not only an encoder model but also a decoder. The resulting autoencoder is trained with pairs of sequences (and their true edit distance) which are encoded into the latent vector space and then decoded. The loss combines an edit distance approximation component and a sequence reconstruction one. The first is expressed as the MSE between the real edit distance and the vector distance between the latent embeddings. The second is expressed as the mean element-wise cross-entropy loss of the outputs with the real sequences. While this element-wise loss does not perfectly reflect the edit distance, it is an effective solution to the problem of lack of differentiability of the latter. Therefore, given two strings  $s_1$  and  $s_2$  of length  $n$  and a vector distance  $d$ , the loss of a model with encoder  $f_\theta$  and decoder  $g_{\theta'}$  is:

$$L(\theta, \theta') = \underbrace{(1 - \alpha) L_{ED}(\theta)}_{\text{edit distance}} + \underbrace{\alpha L_R(\theta, \theta')}_{\text{reconstruction}} \quad (12)$$

$$\text{where } L_{ED}(\theta) = (n^{-1} ED(s_1, s_2) - d(f_\theta(s_1), f_\theta(s_2)))^2$$

671

$$\text{and } L_R(\theta, \theta') = \frac{1}{2n} \sum_{i=0}^{n-1} (H(s_1[i], g_{\theta'}(f_{\theta}(s_1)))[i]) + H(s_2[i], g_{\theta'}(f_{\theta}(s_2)))[i]))$$

672 where  $\alpha$  is a hyperparameter that controls the trade-off between the two components and  $H(c, \hat{c}) =$   
 673  $c \log(\hat{c}) + (1 - c) \log(1 - \hat{c})$  represents the cross-entropy.

674 One issue with this strategy is that the decoder is not learning to decode any point in the continuous  
 675 space, but only those of the discrete subspace of points to which the generator maps some sequence  
 676 from the domain. This creates a problem when, at test time, we try to decode points that are outside  
 677 the subspace hoping to retrieve the string that maps to the point in the subspace closest to it. To  
 678 alleviate this issue, during training, Gaussian noise is added to the embedded point in the latent space  
 679 before decoding it, which forces the decoder to be robust to points not produced by the encoder.  
 680 To make the noisy model trainable with gradient descent, we employ the reparameterization trick  
 681 commonly used for Variational Auto-Encoders [69] making the randomness an input to the model.  
 682 Therefore, the reconstruction loss becomes:

$$L_R(\theta, \theta', \epsilon) = \frac{1}{2n} \sum_{i=0}^{n-1} (H(s_1[i], g_{\theta'}(f_{\theta}(s_1) + \epsilon_{1i}))[i]) + H(s_2[i], g_{\theta'}(f_{\theta}(s_2) + \epsilon_{2i}))[i])) \quad (13)$$

683 where  $\forall i, j \quad \epsilon_{ij} \sim \mathcal{N}(0, \sigma^2 \mathbb{I})$  and  $\sigma$  is a hyperparameter.

684 In the hyperbolic space adding the Euclidean Gaussian distribution would not distribute uniformly,  
 685 therefore we Wrapped Normal generalisation of the Gaussian distribution to the Poincaré ball [70]  
 686 was used. Finally, for the cosine space, we normalise the outputs of the encoder and the input of the  
 687 decoder to the unit hyper-sphere.

688 **Testing** At test time, given a set of strings, we want to obtain an approximation of the Steiner string,  
 689 which minimises the consensus error (sum of distance to the strings in the set). In the sequence  
 690 space with the edit distance finding the median point is a hard combinatorial optimisation problem.  
 691 However in the space of real vectors with the distance functions used in this project, it becomes a  
 692 relatively simple procedure which can be done explicitly in some cases (e.g. with square distance)  
 693 or using classical optimisation algorithms<sup>3</sup>. Therefore, the Steiner string  $s^*$  of a set of strings  $S$  is  
 694 approximated by:

$$s^* = \arg \min_{s'} \sum_{s_i \in S} ED(s', s_i) \approx g_{\theta'} \left( \arg \min_x \sum_{s_i \in S} d(x, f_{\theta}(s_i)) \right) \quad (14)$$

695 The continuous optimisation is performed using the COBYLA [71] (for the hyperbolic distance) and  
 696 BFGS [72, 73, 74, 75] (for all the others) algorithms implemented in the Python library SciPy [76].

697 The produced predictions are then discretised to obtain actual sequences taking the most likely  
 698 character for each element in the sequence and then evaluated by computing their average consensus  
 699 error:

$$E(\hat{s}^*) = \frac{1}{|S|} \sum_{s' \in S} ED(\hat{s}^*, s') \quad (15)$$

---

<sup>3</sup>If the distance function is convex such as in the Euclidean case, the resulting optimisation problem is also convex.

## References

- [1] Hila Sberro, Brayon J Fremin, Soumaya Zlitni, Fredrik Edfors, Nicholas Greenfield, Michael P Snyder, Georgios A Pavlopoulos, Nikos C Kyrpides, and Ami S Bhatt. Large-scale analyses of human microbiomes reveal thousands of small, novel genes. *Cell*, 2019.
- [2] Edoardo Pasolli, Francesca De Filippis, Italia E Mauriello, Fabio Cumbo, Aaron M Walsh, John Leech, Paul D Cotter, Nicola Segata, and Danilo Ercolini. Large-scale genome-wide analysis links lactic acid bacteria from food with the gut microbiome. *Nature communications*, 2020.
- [3] Alexander Kurilshikov, Carolina Medina-Gomez, Rodrigo Bacigalupe, Djawad Radjabzadeh, Jun Wang, Ayse Demirkan, Caroline I Le Roy, Juan Antonio Raygoza Garay, Casey T Finnicum, Xingrong Liu, et al. Large-scale association analyses identify host factors influencing human gut microbiome composition. *Nature Genetics*, 2021.
- [4] Saul B Needleman and Christian D Wunsch. A general method applicable to the search for similarities in the amino acid sequence of two proteins. *Journal of molecular biology*, 1970.
- [5] Samuel Kariin and Chris Burge. Dinucleotide relative abundance extremes: a genomic signature. *Trends in genetics*, 1995.
- [6] Robert R Sokal. A statistical method for evaluating systematic relationships. *Univ. Kansas, Sci. Bull.*, 1958.
- [7] Ramu Chenna, Hideaki Sugawara, Tadashi Koike, Rodrigo Lopez, Toby J Gibson, Desmond G Higgins, and Julie D Thompson. Multiple sequence alignment with the Clustal series of programs. *Nucleic acids research*, 2003.
- [8] Archit Verma and Barbara E Engelhardt. A robust nonlinear low-dimensional manifold for single cell rna-seq data. *BMC bioinformatics*, 2020.
- [9] Richard C Tillquist. Low-dimensional representation of biological sequence data. In *Proceedings of the 10th ACM International Conference on Bioinformatics, Computational Biology and Health Informatics*, 2019.
- [10] Anna Klimovskaia, David Lopez-Paz, Léon Bottou, and Maximilian Nickel. Poincaré maps for analyzing complex hierarchies in single-cell data. *Nature communications*, 2020.
- [11] Wei Zheng, Le Yang, Robert J Genco, Jean Wactawski-Wende, Michael Buck, and Yijun Sun. SENSE: Siamese neural network for sequence embedding and alignment-free comparison. *Bioinformatics*, 2019.
- [12] Satoshi Koide, Keisuke Kawano, and Takuro Kutsuna. Neural edit operations for biological sequences. In *NeurIPS*, 2018.
- [13] Matthew McDermott, Brendan Yap, Peter Szolovits, and Marinka Zitnik. Rethinking relational encoding in language model: Pre-training for general sequences. *arXiv preprint arXiv:2103.10334*, 2021.
- [14] UniProt Consortium. Uniprot: a hub for protein information. *Nucleic acids research*, 2015.
- [15] Sanjoy Dasgupta. A cost function for similarity-based hierarchical clustering. In *Proc. Annual ACM SIGACT Symposium on Theory of Computing*, 2016.
- [16] Kazimierz Florek, Jan Łukaszewicz, Julian Perkal, Hugo Steinhaus, and Stefan Zubrzycki. Sur la liaison et la division des points d’un ensemble fini. In *Colloquium mathematicum*, 1951.
- [17] Thorvald Julius Sørensen. A method of establishing groups of equal amplitude in plant sociology based on similarity of species content and its application to analyses of the vegetation on Danish commons. 1948.
- [18] Ines Chami, Albert Gu, Vaggos Chatziafratis, and Christopher Ré. From trees to continuous embeddings and back: Hyperbolic hierarchical clustering. In *NeurIPS*, 2020.
- [19] Jose C Clemente, Erica C Pehrsson, Martin J Blaser, Kuldip Sandhu, Zhan Gao, Bin Wang, Magda Magris, Glida Hidalgo, Monica Contreras, Óscar Noya-Alarcón, et al. The microbiome of uncontacted amerindians. *Science advances*, 2015.
- [20] Rupesh Kanchi Ravi, Kendra Walton, and Mahdiah Khosroheidari. Miseq: a next generation sequencing platform for genomic analysis. *Disease gene identification*, 2018.
- [21] Jian Chen, Le Yang, Lu Li, and Yijun Sun. Predicting alignment distances via continuous sequence matching. *bioRxiv*, 2020.

- 749 [22] Xiyuan Zhang, Yang Yuan, and Piotr Indyk. Neural embeddings for nearest neighbor search under edit  
750 distance. 2019.
- 751 [23] Xinyan Dai, Xiao Yan, Kaiwen Zhou, Yuxuan Wang, Han Yang, and James Cheng. Convolutional  
752 embedding for edit distance. In *Proc. of SIGIR*, 2020.
- 753 [24] Lluís Gómez, Marçal Rusinol, and Dimosthenis Karatzas. Lsde: Levenshtein space deep embedding for  
754 query-by-string word spotting. In *ICDAR*, 2017.
- 755 [25] Kyunghyun Cho, Bart van Merriënboer, Caglar Gulcehre, Dzmitry Bahdanau, Fethi Bougares, Holger  
756 Schwenk, and Yoshua Bengio. Learning phrase representations using RNN encoder–decoder for statistical  
757 machine translation. In *Proc. of EMNLP*, 2014.
- 758 [26] Ashish Vaswani, Noam Shazeer, Niki Parmar, Jakob Uszkoreit, Llion Jones, Aidan N. Gomez, Lukasz  
759 Kaiser, and Illia Polosukhin. Attention is all you need. In *NeurIPS*, 2017.
- 760 [27] Maximilian Nickel and Douwe Kiela. Poincaré embeddings for learning hierarchical representations. *arXiv*  
761 *preprint arXiv:1705.08039*, 2017.
- 762 [28] Benjamin Paul Chamberlain, James Clough, and Marc Peter Deisenroth. Neural embeddings of graphs in  
763 hyperbolic space. *arXiv preprint arXiv:1705.10359*, 2017.
- 764 [29] Ines Chami, Adva Wolf, Da-Cheng Juan, Frederic Sala, Sujith Ravi, and Christopher Ré. Low-dimensional  
765 hyperbolic knowledge graph embeddings. In *Proc. of ACL*, 2020.
- 766 [30] Graham Cormode. *Sequence distance embeddings*. PhD thesis, Department of Computer Science,  
767 University of Warwick, 2003.
- 768 [31] S Muthukrishnan and Süleyman Cenk Sahinalp. Approximate nearest neighbors and sequence comparison  
769 with block operations. In *Proc. annual ACM symposium on Theory of computing*, 2000.
- 770 [32] Graham Cormode, Shan Muthukrishnan, and Süleyman Cenk Sahinalp. Permutation editing and matching  
771 via embeddings. In *International Colloquium on Automata, Languages, and Programming*, 2001.
- 772 [33] Rafail Ostrovsky and Yuval Rabani. Low distortion embeddings for edit distance. *Journal of the ACM*  
773 *(JACM)*, 2007.
- 774 [34] Tugkan Batu, Funda Ergun, and Cenk Sahinalp. Oblivious string embeddings and edit distance approxima-  
775 tions. In *SODA*, 2006.
- 776 [35] Hossein Jowhari. Efficient communication protocols for deciding edit distance. In *European Symposium*  
777 *on Algorithms*, 2012.
- 778 [36] Alexandr Andoni and Krzysztof Onak. Approximating edit distance in near-linear time. *SIAM Journal on*  
779 *Computing*, 2012.
- 780 [37] Diptarka Chakraborty, Elazar Goldenberg, and Michal Koucký. Streaming algorithms for embedding and  
781 computing edit distance in the low distance regime. In *Proc. of STOC*, 2016.
- 782 [38] Jingdong Wang, Ting Zhang, Nicu Sebe, Heng Tao Shen, et al. A survey on learning to hash. *IEEE*  
783 *transactions on pattern analysis and machine intelligence*, 2017.
- 784 [39] Brian Kulis et al. Metric learning: A survey. *Foundations and trends in machine learning*, 2012.
- 785 [40] Aurélien Bellet, Amaury Habrard, and Marc Sebban. A survey on metric learning for feature vectors and  
786 structured data. *arXiv preprint arXiv:1306.6709*, 2013.
- 787 [41] Th Dobzhansky and Alfred H Sturtevant. Inversions in the chromosomes of *Drosophila pseudoobscura*.  
788 *Genetics*, 1938.
- 789 [42] Pavel Pevzner. *Computational molecular biology: an algorithmic approach*. 2000.
- 790 [43] Naruya Saitou and Masatoshi Nei. The neighbor-joining method: a new method for reconstructing  
791 phylogenetic trees. *Molecular biology and evolution*, 1987.
- 792 [44] Ferenc Kruzslizcz. Improved greedy algorithm for computing approximate median strings. *Acta Cybernetica*,  
793 1999.
- 794 [45] Francisco Casacuberta and M De Antonio. A greedy algorithm for computing approximate median strings.  
795 In *Proc. of National Symposium on Pattern Recognition and Image Analysis*, 1997.



- 796 [46] Wei Peng, Tuomas Varanka, Abdelrahman Mostafa, Henglin Shi, and Guoying Zhao. Hyperbolic deep  
797 neural networks: A survey. *arXiv preprint arXiv:2101.04562*, 2021.
- 798 [47] Albert Gu, Frederic Sala, Beliz Gunel, and Christopher Ré. Learning mixed-curvature representations in  
799 product spaces. In *Proc. of ICLR*, 2019.
- 800 [48] Ondrej Skopec, Octavian-Eugen Ganea, and Gary Bécigneul. Mixed-curvature variational autoencoders.  
801 In *Proc. of ICLR*, 2020.
- 802 [49] Octavian-Eugen Ganea, Gary Bécigneul, and Thomas Hofmann. Hyperbolic neural networks. In *NeurIPS*,  
803 2018.
- 804 [50] Ines Chami, Zhitao Ying, Christopher Ré, and Jure Leskovec. Hyperbolic graph convolutional neural  
805 networks. In *NeurIPS*, 2019.
- 806 [51] Michael M Bronstein, Joan Bruna, Yann LeCun, Arthur Szlam, and Pierre Vandergheynst. Geometric deep  
807 learning: going beyond Euclidean data. *IEEE Signal Processing Magazine*, 2017.
- 808 [52] Michael M. Bronstein, Joan Bruna, Taco Cohen, and Petar Veličković. Geometric deep learning: Grids,  
809 groups, graphs, geodesics, and gauges, 2021.
- 810 [53] Dan Gusfield. Algorithms on stings, trees, and sequences: Computer science and computational biology.  
811 *Acm Sigact News*, 1997.
- 812 [54] Phillip Compeau and PA Pevzner. *Bioinformatics algorithms: an active learning approach*. 2018.
- 813 [55] William J Masek and Michael S Paterson. A faster algorithm computing string edit distances. *Journal of*  
814 *Computer and System sciences*, 1980.
- 815 [56] Arturs Backurs and Piotr Indyk. Edit distance cannot be computed in strongly subquadratic time (unless  
816 SETH is false). In *Proc. of STOC*, 2015.
- 817 [57] Gregory E Sims, Se-Ran Jun, Guohong A Wu, and Sung-Hou Kim. Alignment-free genome comparison  
818 with feature frequency profiles (FFP) and optimal resolutions. *Proceedings of the National Academy of*  
819 *Sciences*, 2009.
- 820 [58] Igor Ulitsky, David Burstein, Tamir Tuller, and Benny Chor. The average common substring approach to  
821 phylogenomic reconstruction. *Journal of Computational Biology*, 2006.
- 822 [59] Chris-Andre Leimeister and Burkhard Morgenstern. Kmacs: the k-mismatch average common substring  
823 approach to alignment-free sequence comparison. *Bioinformatics*, 2014.
- 824 [60] Lusheng Wang and Tao Jiang. On the complexity of multiple sequence alignment. *Journal of computational*  
825 *biology*, 1994.
- 826 [61] Robert C Edgar. MUSCLE: multiple sequence alignment with high accuracy and high throughput. *Nucleic*  
827 *acids research*, 2004.
- 828 [62] Nitish Srivastava, Geoffrey Hinton, Alex Krizhevsky, Ilya Sutskever, and Ruslan Salakhutdinov. Dropout:  
829 a simple way to prevent neural networks from overfitting. *The journal of machine learning research*, 2014.
- 830 [63] Sergey Ioffe and Christian Szegedy. Batch normalization: Accelerating deep network training by reducing  
831 internal covariate shift. In *Proc. ICML*, 2015.
- 832 [64] Jimmy Lei Ba, Jamie Ryan Kiros, and Geoffrey E Hinton. Layer normalization. *arXiv preprint*  
833 *arXiv:1607.06450*, 2016.
- 834 [65] Diederik P. Kingma and Jimmy Ba. Adam: A method for stochastic optimization. In *Proc. of ICLR*, 2015.
- 835 [66] Elad Hoffer and Nir Ailon. Deep metric learning using triplet network. In *International workshop on*  
836 *similarity-based pattern recognition*, 2015.
- 837 [67] Vassileios Balntas, Edgar Riba, Daniel Ponsa, and Krystian Mikolajczyk. Learning local feature descriptors  
838 with triplets and shallow convolutional neural networks. In *Proc. of BMVC*, 2016.
- 839 [68] Florian Schroff, Dmitry Kalenichenko, and James Philbin. Facenet: A unified embedding for face  
840 recognition and clustering. In *CVPR*, 2015.
- 841 [69] Diederik P. Kingma and Max Welling. Auto-encoding variational bayes. In *Proc. of ICLR*, 2014.

- 842 [70] Emile Mathieu, Charline Le Lan, Chris J Maddison, Ryota Tomioka, and Yee Whye Teh. Continuous  
843 hierarchical representations with Poincaré variational auto-encoders. In *NeurIPS*, 2019.
- 844 [71] Michael JD Powell. A direct search optimization method that models the objective and constraint functions  
845 by linear interpolation. In *Advances in optimization and numerical analysis*. 1994.
- 846 [72] Charles George Broyden. The convergence of a class of double-rank minimization algorithms 1. general  
847 considerations. *IMA Journal of Applied Mathematics*, 1970.
- 848 [73] Roger Fletcher. A new approach to variable metric algorithms. *The computer journal*, 1970.
- 849 [74] Donald Goldfarb. A family of variable-metric methods derived by variational means. *Mathematics of*  
850 *computation*, 1970.
- 851 [75] David F Shanno. Conditioning of quasi-newton methods for function minimization. *Mathematics of*  
852 *computation*, 1970.
- 853 [76] Pauli Virtanen, Ralf Gommers, Travis E Oliphant, Matt Haberland, Tyler Reddy, David Cournapeau,  
854 Evgeni Burovski, Pearu Peterson, Warren Weckesser, Jonathan Bright, et al. Scipy 1.0: fundamental  
855 algorithms for scientific computing in Python. *Nature methods*, 2020.
